# Supplementary material
Source: Springer Nature journal article supplement (https://www.springermedizin.de/resource/supplementary/12889_2007_981_MOESM2_ESM.pdf/9502408)
Supplement: MOESM2 [file 9502408]

---

Table 2. Characteristics of participants

Focus groups participants (n = 11)

*Gender*

|        |   |
|--------|---|
| -Women | 5 |
| - Men  | 6 |

*Age*

|        |   |
|--------|---|
| -18-25 | 4 |
| -26-35 | 4 |
| -36-67 | 3 |

*Education*

|                                |   |
|--------------------------------|---|
| - Partly illiterate/illiterate | 2 |
| - 1-6 years                    | 3 |
| - 7-10 years                   | 4 |
| - 11-13 years                  | 2 |

*Occupation*

|                              |   |
|------------------------------|---|
| - Daily labourer             | 3 |
| - Civil servant              | 3 |
| - Employed in private sector | 2 |
| - Other                      | 3 |

Individual interviews with health personnel (n = 5)

*Gender*

|         |   |
|---------|---|
| - Women | 2 |
| - Men   | 3 |

*Education*

|                  |   |
|------------------|---|
| - Nurse          | 4 |
| - Medical doctor | 1 |

Individual interviews with others (n = 6)

|                                                 |   |
|-------------------------------------------------|---|
| - Relatives of dead/dying patients              | 4 |
| - Patients on re-treatment (treatment failures) | 2 |
